# Supplementary material for: Improving electronic information sharing for palliative care patients
Source: PubMed Central journal article supplement — BMJ Qual Improv Rep. 2014 Apr 22;3(1):u201904.w1014. doi: 10.1136/bmjquality.u201904.w1014 (PMC4645862; doi:10.1136/bmjquality.u201904.w1014), 2014-04-22

Table 2: The percentage of patients with each completed ePCS field (N=185). 2012.

| ePCS Field                                                          | Percentage of Patients |
|---------------------------------------------------------------------|------------------------|
| <b>Patient Medical Condition</b>                                    |                        |
| Main diagnoses                                                      | 67%                    |
| Other relevant issues – free text                                   | 26%                    |
| <b>Advice for Out Of Hours Care</b>                                 |                        |
| Care Plan agreed                                                    | 84%                    |
| Care Plan agreed – free text                                        | 9%                     |
| Preferred place of care                                             | 40%                    |
| Preferred place of care – free text                                 | 39%                    |
| Should GP be contacted out of hours?                                | 54%                    |
| GP Contact details                                                  | 6%                     |
| Resuscitation status agreed?                                        | 90%                    |
| Actual resuscitation status                                         | 47%                    |
| Resuscitation status – free text                                    | 23%                    |
| Will GP sign death certificate in normal circumstances?             | 92%                    |
| Will GP sign death certificate in normal circumstances? - free text | 3%                     |
| Additional useful OOH information –free text                        | 21%                    |
| <b>Current Care Arrangements</b>                                    |                        |
| Current Care Arrangements                                           | 57%                    |
| Current Care Arrangements – free text                               | 23%                    |
| On Palliative Care                                                  | 96%                    |
| On Palliative Care – free text                                      | 26%                    |
| Syringe driver at home                                              | 5%                     |
| Catheter continence products at home                                | 18%                    |
| Moving and Handling equipment at home                               | 17%                    |
| <b>Patient and Carer Awareness of Condition</b>                     |                        |
| Patient’s understanding of Diagnosis                                | 80%                    |
| Patient’s understanding of Prognosis                                | 54%                    |
| Carer’s understanding of Diagnosis                                  | 64%                    |
| Carer’s understanding of Prognosis                                  | 34%                    |
| Awareness and understanding – free text                             | 20%                    |
| <b>Patient &amp; Carer Details</b>                                  |                        |
| Access Information / potential issues                               | 5%                     |
| Carer Details                                                       | 18%                    |
| Next of kin details                                                 | 32%                    |
| Nurse                                                               | 36%                    |
| Additional drugs available at home                                  | 15%                    |

Figure 1: Percentage completion of ePCS (N=185). 2012.

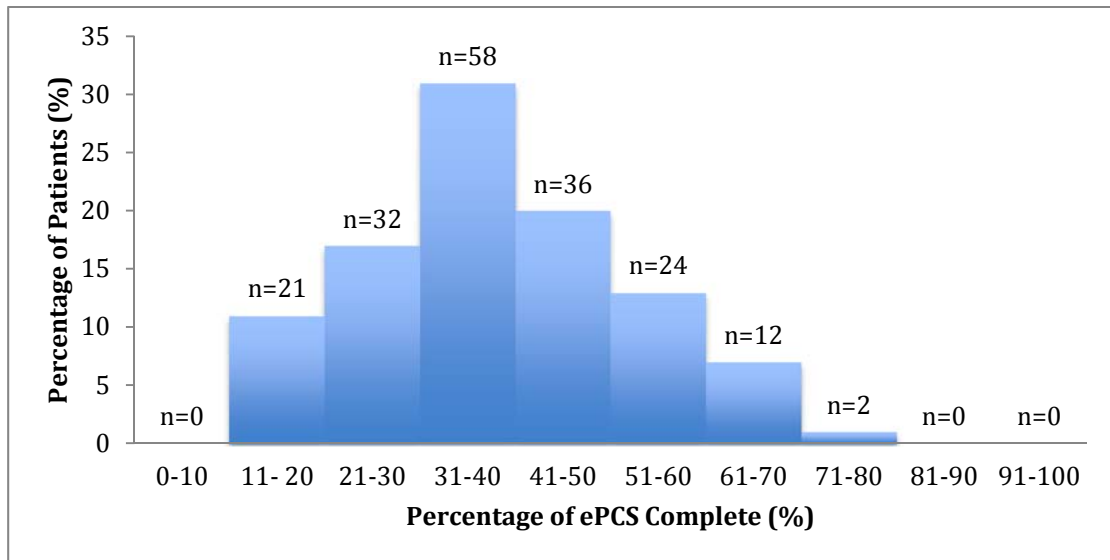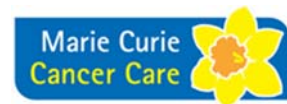

Supplement: bmjqir-3-u201904-w1014-s2.pdf [file bmjqir-3-u201904-w1014-s2.pdf]
