# Supplementary material for: Improving electronic information sharing for palliative care patients
Source: PubMed Central journal article supplement — BMJ Qual Improv Rep. 2014 Apr 22;3(1):u201904.w1014. doi: 10.1136/bmjquality.u201904.w1014 (PMC4645862; doi:10.1136/bmjquality.u201904.w1014), 2014-04-22

**Table 1: Proportion of patients, known to the four specialist palliative care teams in Lothian, with electronic information available to Out-of-Hours services.**

| <b>Audit year</b> | <b>Total number of patients registered</b> | <b>Number of patients with information available to OOH (%)</b> | <b>Number with SN only (%)</b> | <b>Number with ePCS only (%)</b> | <b>Number with both SN and ePCS (%)</b> |
|-------------------|--------------------------------------------|-----------------------------------------------------------------|--------------------------------|----------------------------------|-----------------------------------------|
| <b>2008</b>       | 377                                        | 189 (49%)                                                       | 189 (49%)                      | -                                | -                                       |
| <b>2012</b>       | 346                                        | 260 (75%)                                                       | 75 (22%)                       | 93 (27%)                         | 92 (26%)                                |
| <b>2013</b>       | 422                                        | 300 (71%)                                                       | 71 (17%)                       | 99 (23%)                         | 130 (31%)                               |

SN – Special note, ePCS – electronic palliative care summaries, OOH – Out of hours

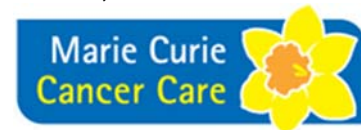

Supplement: bmjqir-3-u201904-w1014-s1.pdf [file bmjqir-3-u201904-w1014-s1.pdf]
