# Supplementary material for: Improving electronic information sharing for palliative care patients
Source: PubMed Central journal article supplement — BMJ Qual Improv Rep. 2014 Apr 22;3(1):u201904.w1014. doi: 10.1136/bmjquality.u201904.w1014 (PMC4645862; doi:10.1136/bmjquality.u201904.w1014), 2014-04-22

Table 3: Patients known to the four specialist palliative care teams in Lothian according to illness trajectory.

| <b>Year</b>               | <b>2012</b>                         |                                   | <b>2013</b>                         |                                   |
|---------------------------|-------------------------------------|-----------------------------------|-------------------------------------|-----------------------------------|
| <b>Illness Trajectory</b> | <b>Number of Patients<br/>N=346</b> | <b>Percentage of Patients (%)</b> | <b>Number of Patients<br/>N=422</b> | <b>Percentage of Patients (%)</b> |
| Cancer                    | 314                                 | 91                                | 374                                 | 89                                |
| Non-cancer*               | 32                                  | 9                                 | 48                                  | 11                                |

\*Non-cancer include organ failure and frailty/dementia trajectory.

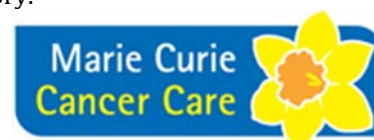

Supplement: bmjqir-3-u201904-w1014-s3.pdf [file bmjqir-3-u201904-w1014-s3.pdf]
